# Supplementary material
Source: PubMed Central journal article supplement (PMC7517591)
Supplement: NIHMS1033672-supplement-AppRef.pdf [file NIHMS1033672-supplement-AppRef.pdf]

## References Used in the Appendix

- Acemoglu, Daron and Amy Finkelstein □Input and Technology Choices in Regulated Industries: Evidence from the Health Care Sector□*Journal of Political Economy*, 116:5 (2008) 837-879
- Bresnahan, Timothy, □Empirical Studies of Industries with Market Power□ in *Handbook of Industrial Organization*, Volume 2 (1989): 1011-1057.
- Chernew, Michael E., Lindsay M. Sabik, Amitabh Chandra, Teresa B. Gibson, and Joseph P. Newhouse, "Geographic Correlation Between Large-Firm Commercial Spending and Medicare Spending," *The American Journal of Managed Care*, 16 (2010), 131-138.
- Clemens, Jeffrey, and Joshua D. Gottlieb, "In the Shadow of a Giant: Medicare's Influence on Private Physician Payments," *Journal of Political Economy*, 125 (2017), 1-39.
- Cooper, Zack, Gibbons, Stephen, Jones, Simon, McGuire, Alistair, □Does Hospital Competition Save Lives? Evidence from the English NHS Patient Choice Reforms,□*The Economic Journal*, 121(2011): 228-260.
- Dafny, Leemore, Dranove, David, Limbrock, Frank, Scott Morton, Fiona, □Data Impediments to Empirical Work on Health Insurance Markets,□*B.E. Journal of Economic Analysis and Policy*, 11(2011): 1-24.
- Dranove, David, and Richard Lindrooth, "Hospital Consolidation and Costs: Another Look at the Evidence," *Journal of Health Economics*, 22 (2003), 983-997.
- Gaynor, Martin, and William B. Vogt, "Competition among Hospitals," *The Rand Journal of Economics*, 34 (2003), 764-785.
- Gowrisankaran, Gautam, Aviv Nevo, and Robert Town, "Mergers When Prices Are Negotiated: Evidence from the Hospital Industry," *American Economic Review*, 105 (2015), 172-203.
- Kessler, Daniel, McClellan, Mark, □Is Hospital Competition Socially Wasteful?,□ *Quarterly Journal of Economics*, 115(2000): 577-615.
- Tay, Abigail, □Assessing Competition in Hospital Care Markets: The Importance of Accounting for Quality Differentiation□*Rand Journal of Economics*, 34(2003): 786-814.
- Yale Center for Outcomes Research, □Medicare Hospital Quality Chartbook: Performance Report on Outcomes Measures. Centers for Medicare and Medicaid Services, 2013.
